# Supplementary material for: PARP inhibitors chemopotentiate and synergize with cisplatin to inhibit bladder cancer cell survival and tumor growth
Source: PubMed Central journal article supplement (PMC8944004; doi:10.1186/s12885-022-09376-9), 2022-03-23
Supplement: 12885_2022_9376_MOESM2_ESM.pdf [file 12885_2022_9376_MOESM2_ESM.pdf]

### SV-HUC-1

IB: Cleaved Caspase 3

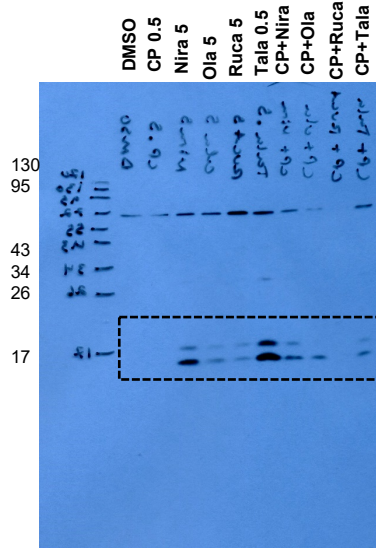

### UM-UC-3

IB: Cleaved Caspase 3

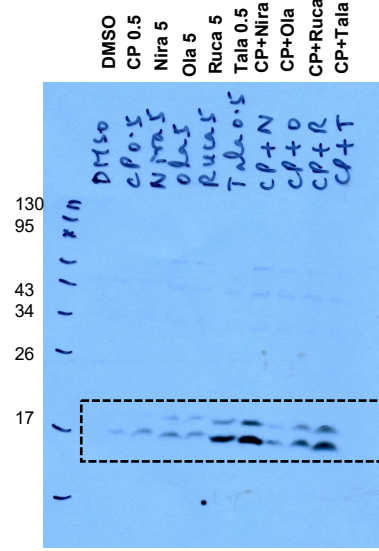

### T-24

IB: Cleaved Caspase 3

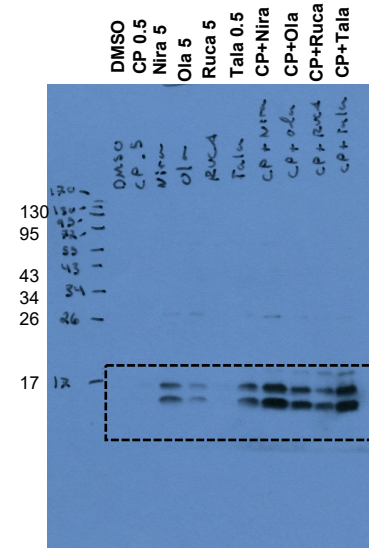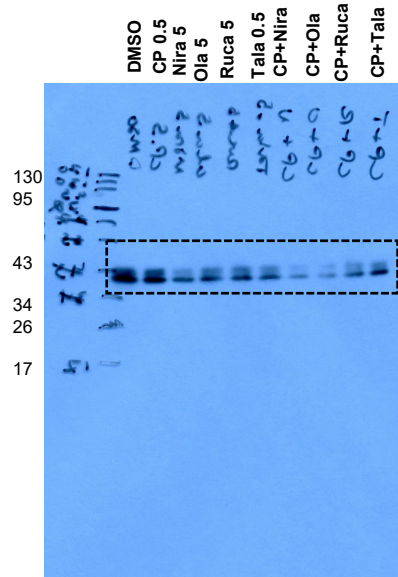

IB: Whole Caspase 3

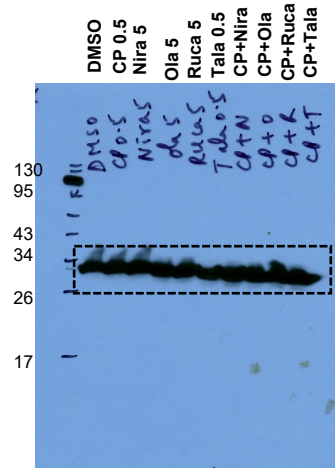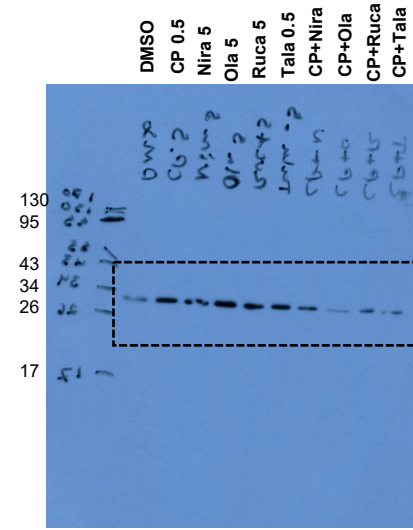

IB: Cleaved Caspase 9

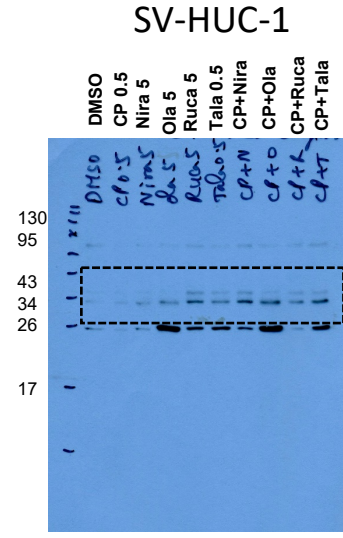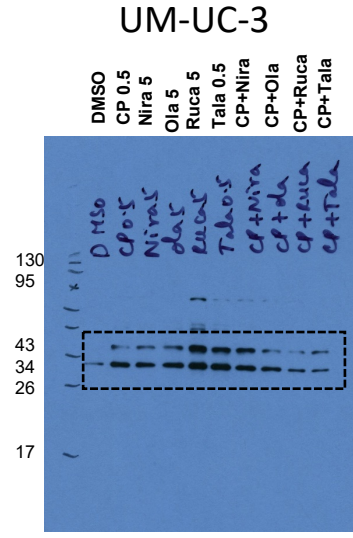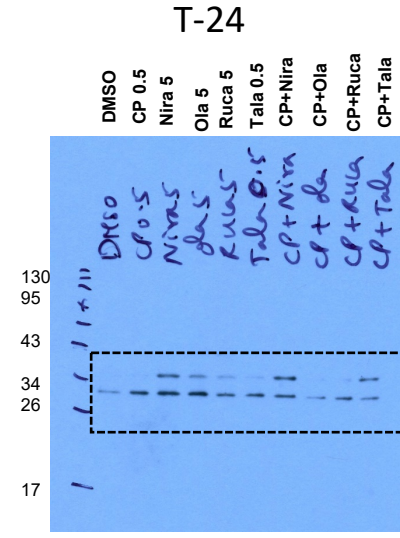

IB: Whole Caspase 9

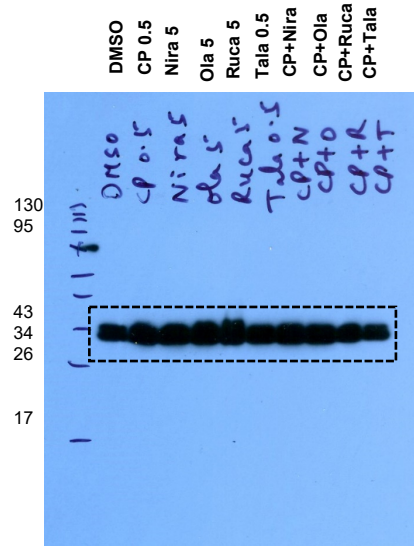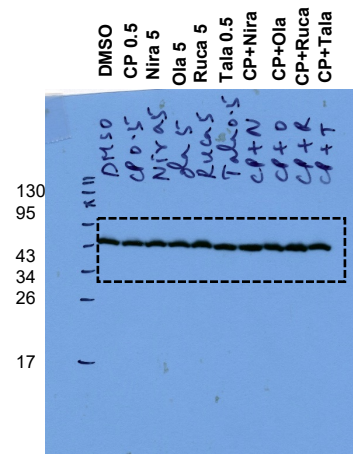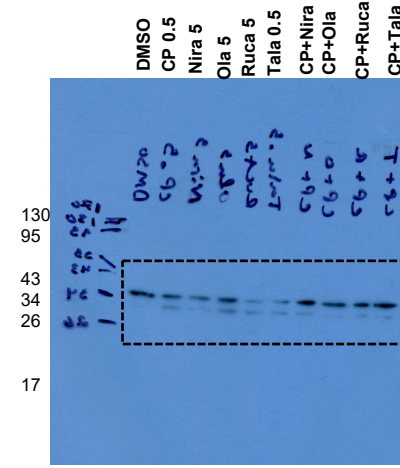

IB: Cleaved PARP

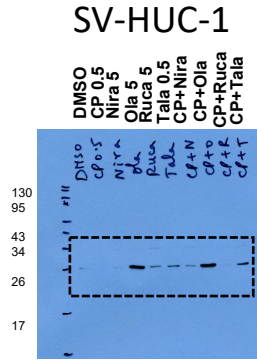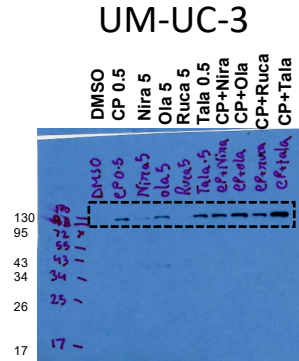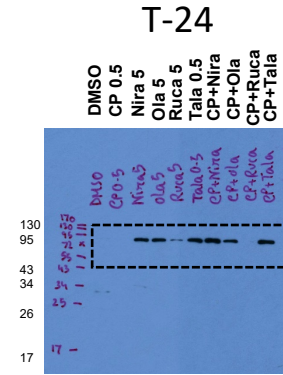

IB: Whole PARP

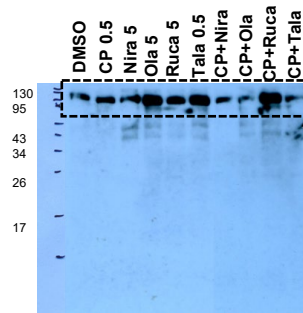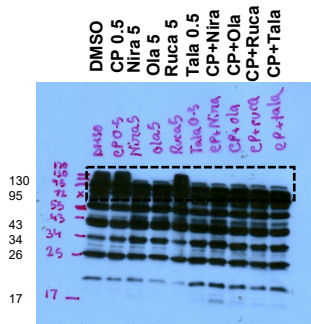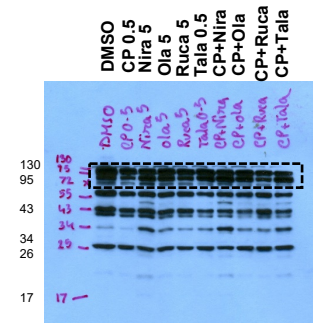

### SV-HUC-1

IB: Tubulin

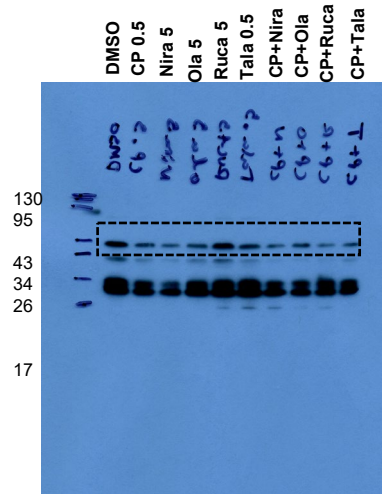

### UM-UC-3

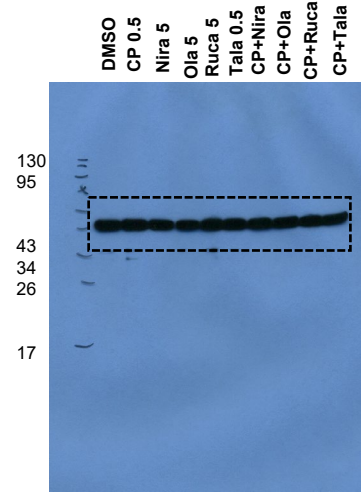

### T-24

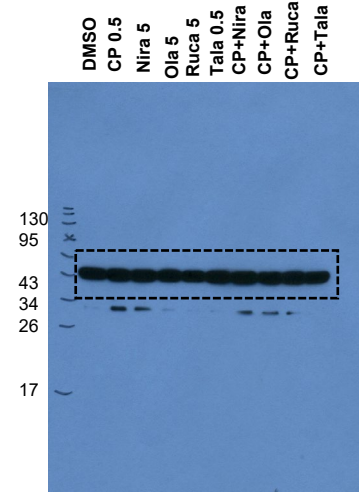

| Antibody                    | Source | Cat#      | Clone        | Vendor         | Dilution used for IHC | Dilution used for Western Blotting | Positive controls for IHC                    |
|-----------------------------|--------|-----------|--------------|----------------|-----------------------|------------------------------------|----------------------------------------------|
| Whole PARP                  | Rabbit | 9542      |              | Cell Signaling |                       | 1:2000                             |                                              |
| Whole Caspase 3             | Rabbit | 14220     | D3R6Y        | Cell Signaling |                       | 1:1000                             |                                              |
| Whole Caspase 7             | Rabbit | 12827     | D2Q3L        | Cell Signaling |                       | 1:1000                             |                                              |
| Whole Caspase 9             | Mouse  | 9508      | C9           | Cell Signaling |                       | 1:1000                             |                                              |
| Cleaved PARP                | Rabbit | 5625      | D64E10 XP    | Cell Signaling |                       | 1:2000                             |                                              |
| Cleaved Caspase 3           | Rabbit | 9664      | D175 5A1E    | Cell Signaling | 1:500                 | 1:1000                             | Prostate cancer cells treated with etoposide |
| Cleaved Caspase 7           | Rabbit | 8438      | Asp198 D6H1  | Cell Signaling | 1:500                 | 1:1000                             | Prostate cancer cells treated with etoposide |
| Cleaved Caspase 9           | Rabbit | 52873     | Asp330 F5Z7N | Cell Signaling | 1:500                 | 1:1000                             | Prostate cancer cells treated with etoposide |
| Tubulin                     | Mouse  | T8328     | AA2          | Sigma          |                       | 1:10000                            |                                              |
| Anti-mouse IgG, HRP-linked  | Horse  | 7076P2    |              | Cell Signaling |                       | 1:5000                             |                                              |
| Anti-rabbit IgG, HRP-linked | Goat   | 7074P2    |              | Cell Signaling |                       | 1:5000                             |                                              |
| Ki-67                       | Rabbit | MA5-14520 | SP6          | Neomarkers     | 1:500                 |                                    | Breast cancer cell xenograft sections        |
