# Supplementary material for: PARP inhibitors chemopotentiate and synergize with cisplatin to inhibit bladder cancer cell survival and tumor growth
Source: PubMed Central journal article supplement (PMC8944004; doi:10.1186/s12885-022-09376-9), 2022-03-23

Suppl. Fig. 2

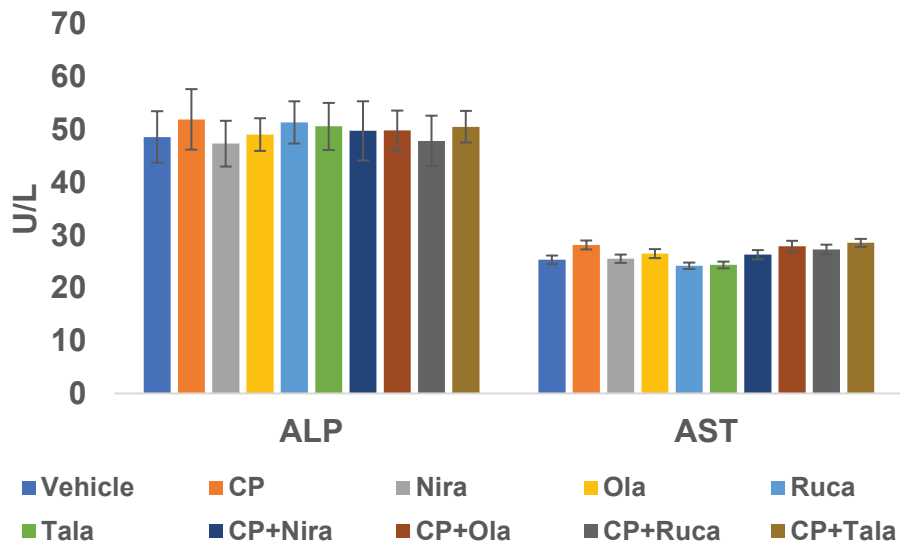

Supplement: 12885_2022_9376_MOESM3_ESM.pdf [file 12885_2022_9376_MOESM3_ESM.pdf]
